# Supplementary material
Source: Springer Nature journal article supplement (https://www.springermedizin.de/resource/supplementary/12889_2013_5661_MOESM3_ESM.docx/9495972)
Supplement: MOESM3 [file 9495972]

Table 3: Agreement with tobacco smoking attitude statements reported by University staff and students

|  | Non-smokers  N (%) | Ex-smokers  N (%) | Smokers  N (%) | Total  N (%) | P value |
| --- | --- | --- | --- | --- | --- |
| If someone smokes cigarettes around me they are causing me harm because of second-hand smoke | 686 (89) | 86 (80.4) | 42 (46.7) | 814 (84.1) | 0.000 |
| I prefer to socialise in a smoke-free environment | 695 (90.1) | 86 (80.4) | 30 (33.3) | 811 (83.8) | 0.000 |
| I seek out smoke-free environments. | 572 (74.2) | 67 (62.6) | 13 (14.4) | 652 (67.4) | 0.000 |
| It disappoints me when a friend who normally doesn’t smoke, smokes cigarettes while drinking | 547 (70.9) | 46 (43) | 13 (14.4) | 606 (62.6) | 0.000 |
| I would rather date a non-smoker | 701 (90.9) | 84 (78.5) | 36 (40) | 821 (84.8) | 0.00 |
| I ask others not to smoke around me | 354 (44.7) | 28 (26.2) | 2 (2.2) | 375 (38.7) | 0.000 |

Agreement with the statement indicated by strongly agree or agree
